# Supplementary material
Source: PubMed Central journal article supplement (PMC3993902)
Supplement: np4009046_si_001.pdf [file np4009046_si_001.pdf]

Supporting Information for:

Analogues of Pawhuskin A: A  $\kappa$ -selective, non-  
nitrogenous opioid receptor antagonist<sup>†</sup>

*Alyssa M. Hartung,<sup>†</sup> John A. Beutler,<sup>‡</sup> Hernán A. Navarro,<sup>§</sup> David F. Wiemer<sup>†</sup> and  
Jeffrey D. Neighbors<sup>†,\*</sup>*

<sup>†</sup>Department of Chemistry, The University of Iowa, Chemistry Building, Iowa City, IA 52242

<sup>‡</sup>Molecular Targets Laboratory, Center for Cancer Research, National Cancer Institute, Frederick, MD  
21702, USA

<sup>§</sup>Discovery Sciences, RTI International, Research Triangle Park, NC 27709

## Supplemental Table of Contents

|                                                               |     |
|---------------------------------------------------------------|-----|
| <sup>1</sup> H NMR Spectrum for compound <b>14</b> (300 MHz)  | S3  |
| <sup>13</sup> C NMR Spectrum for compound <b>14</b> (75 MHz)  | S4  |
| <sup>1</sup> H NMR Spectrum for compound <b>16</b> (300 MHz)  | S5  |
| <sup>13</sup> C NMR Spectrum for compound <b>16</b> (125 MHz) | S6  |
| <sup>1</sup> H NMR Spectrum for compound <b>18</b> (300 MHz)  | S7  |
| <sup>13</sup> C NMR Spectrum for compound <b>18</b> (75 MHz)  | S8  |
| <sup>1</sup> H NMR Spectrum for compound <b>20</b> (500 MHz)  | S9  |
| <sup>13</sup> C NMR Spectrum for compound <b>20</b> (125 MHz) | S10 |
| <sup>1</sup> H NMR Spectrum for compound <b>23</b> (300 MHz)  | S11 |
| <sup>13</sup> C NMR Spectrum for compound <b>23</b> (75 MHz)  | S12 |
| <sup>1</sup> H NMR Spectrum for compound <b>24</b> (300 MHz)  | S13 |
| <sup>13</sup> C NMR Spectrum for compound <b>24</b> (75 MHz)  | S14 |
| <sup>1</sup> H NMR Spectrum for compound <b>25</b> (500 MHz)  | S15 |
| <sup>13</sup> C NMR Spectrum for compound <b>25</b> (125 MHz) | S16 |
| <sup>1</sup> H NMR Spectrum for compound <b>26</b> (500 MHz)  | S17 |
| <sup>13</sup> C NMR Spectrum for compound <b>26</b> (125 MHz) | S18 |
| <sup>1</sup> H NMR Spectrum for compound <b>28</b> (500 MHz)  | S19 |
| <sup>13</sup> C NMR Spectrum for compound <b>28</b> (125 MHz) | S20 |
| <sup>1</sup> H NMR Spectrum for compound <b>29</b> (500 MHz)  | S21 |
| <sup>13</sup> C NMR Spectrum for compound <b>29</b> (125 MHz) | S22 |
| <sup>1</sup> H NMR Spectrum for compound <b>31</b> (300 MHz)  | S23 |
| <sup>13</sup> C NMR Spectrum for compound <b>31</b> (75 MHz)  | S24 |
| <sup>1</sup> H NMR Spectrum for compound <b>36</b> (500 MHz)  | S25 |
| <sup>13</sup> C NMR Spectrum for compound <b>36</b> (125 MHz) | S26 |
| <sup>1</sup> H NMR Spectrum for compound <b>38</b> (500 MHz)  | S27 |
| <sup>13</sup> C NMR Spectrum for compound <b>38</b> (125 MHz) | S28 |

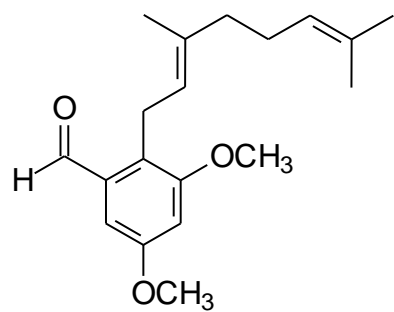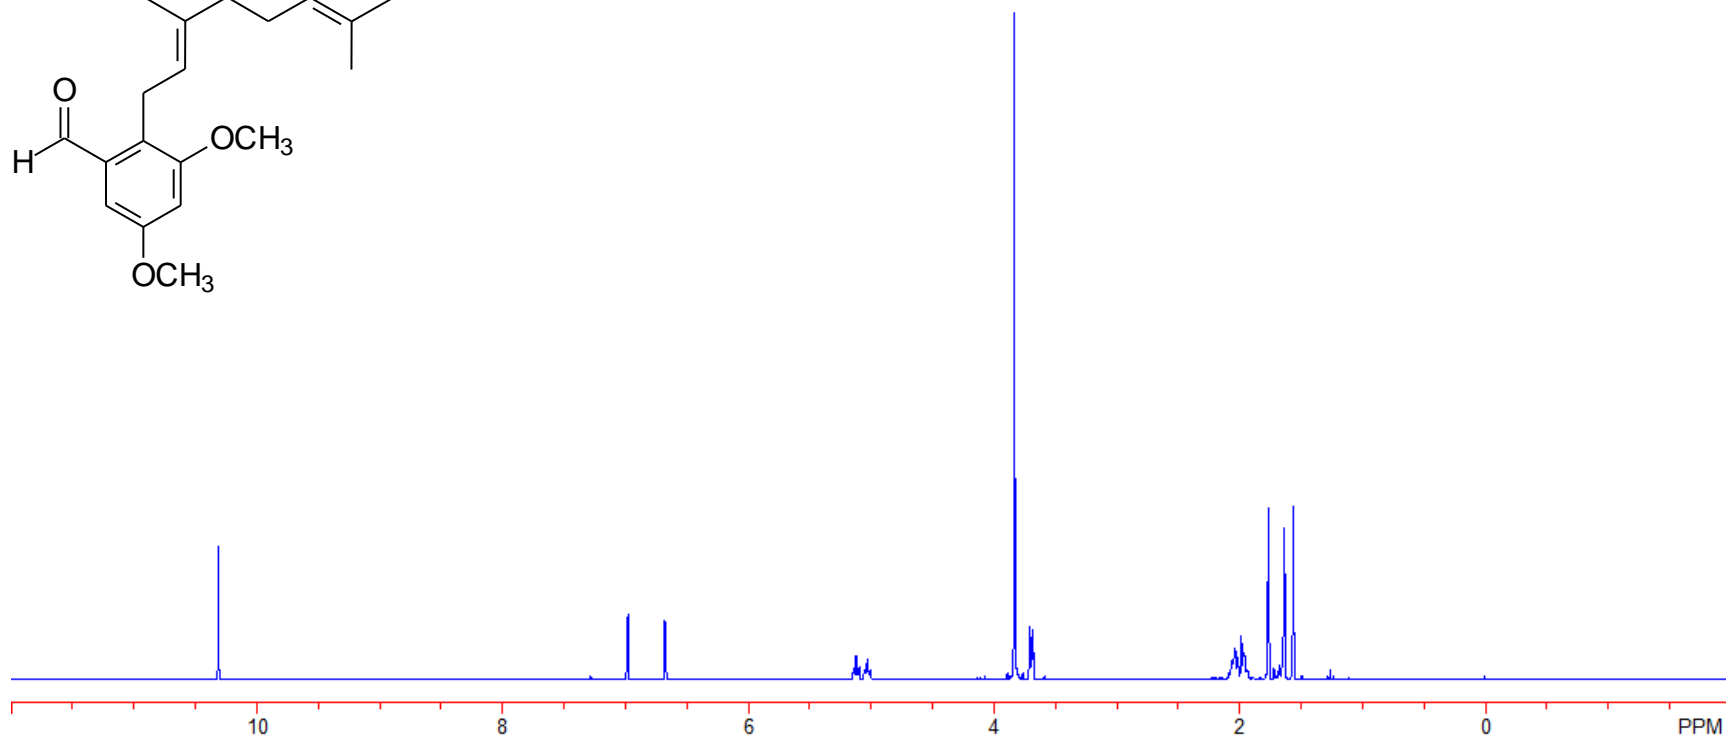

<sup>1</sup>H NMR (300 MHz, CDCl<sub>3</sub>) spectrum of the new compound **14**.

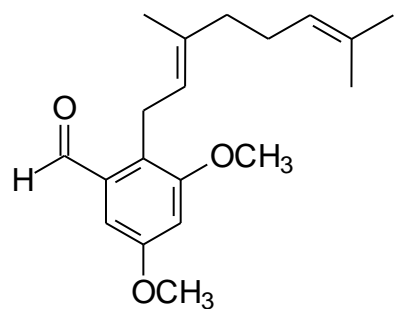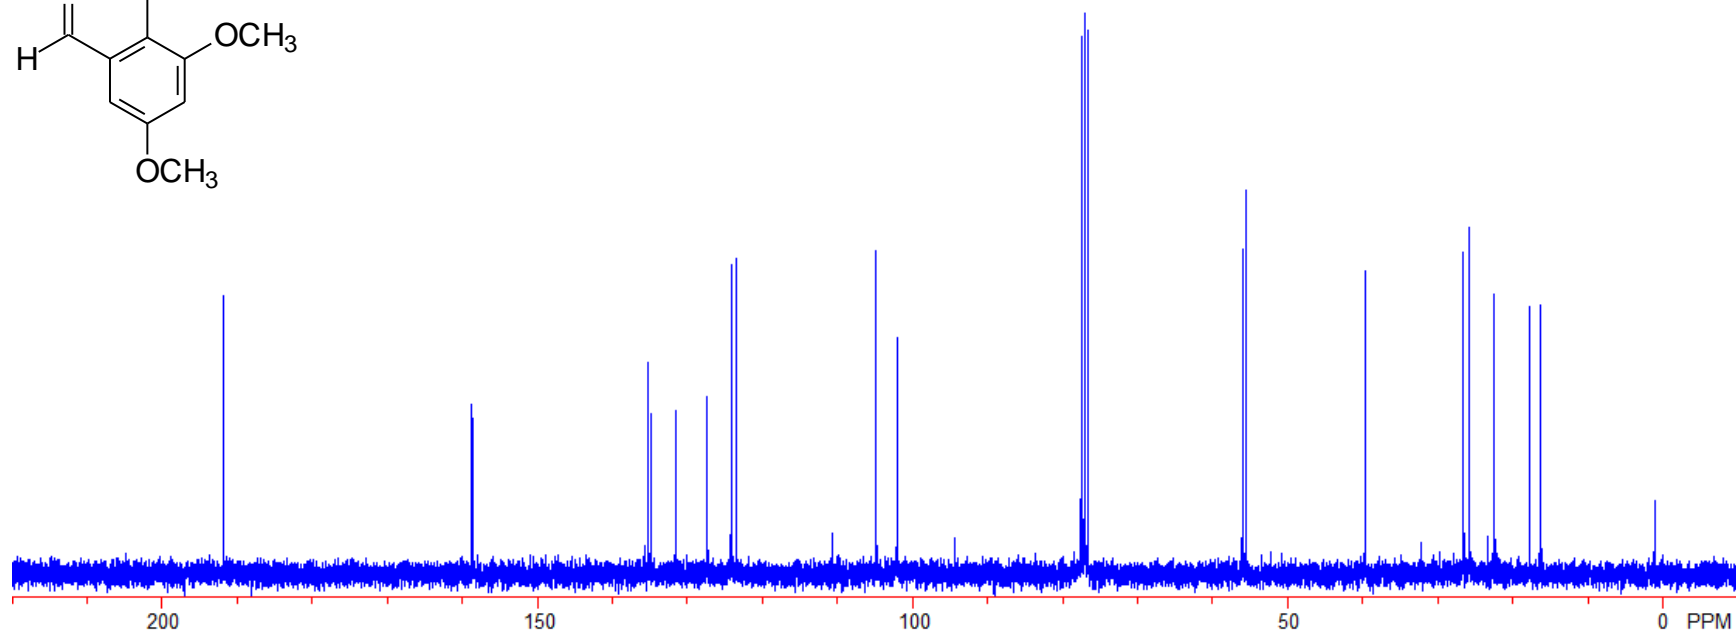

<sup>13</sup>C NMR (75 MHz, CDCl<sub>3</sub>) spectrum of the new compound **14**.

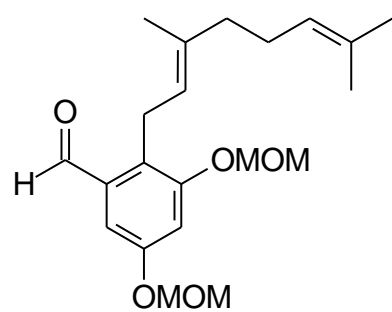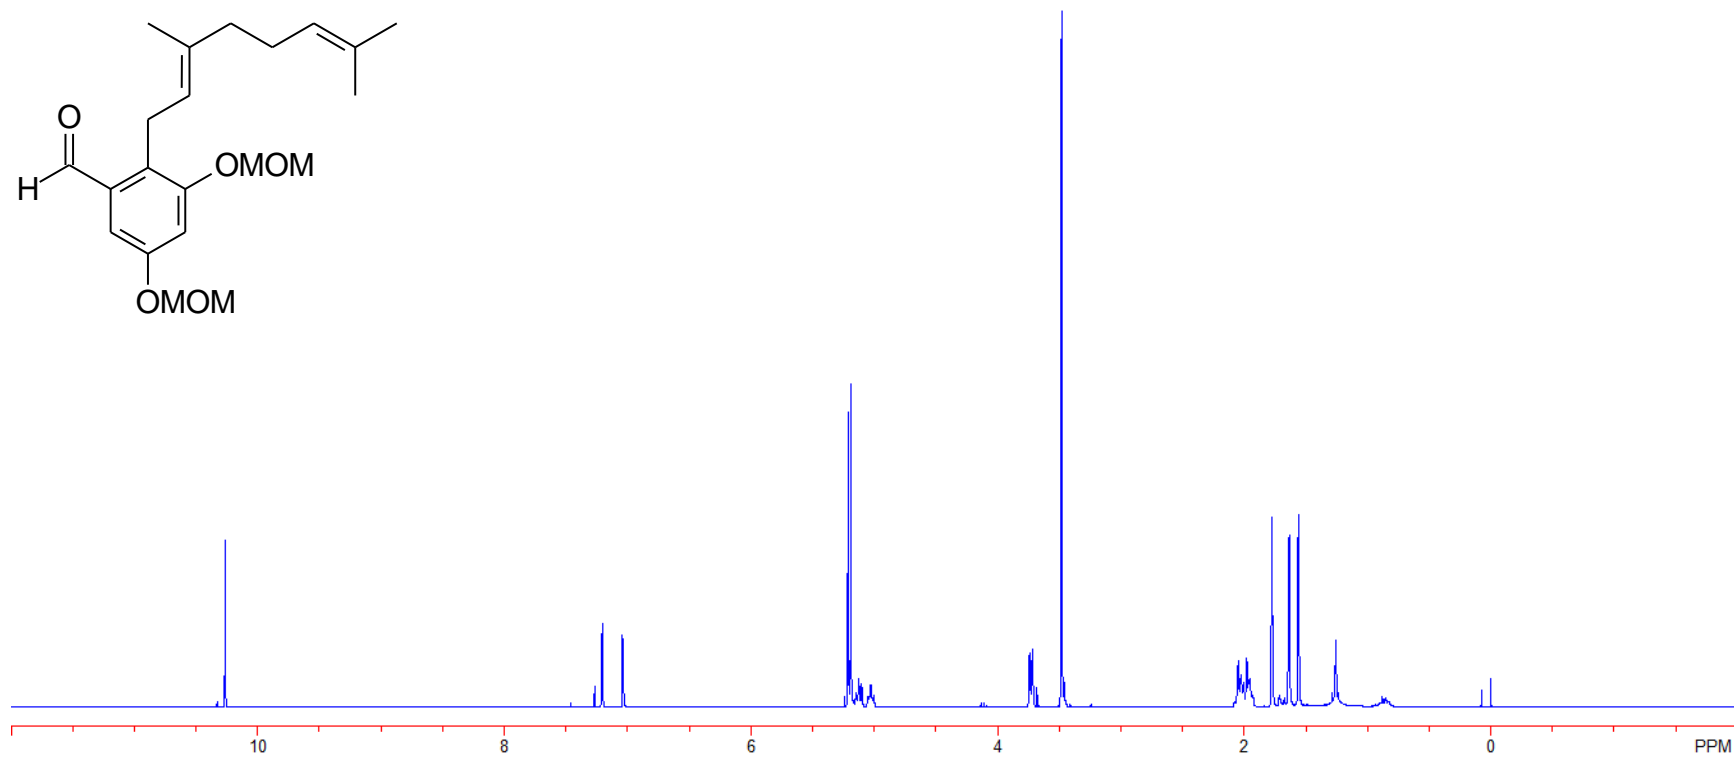

$^1\text{H}$  NMR (300 MHz,  $\text{CDCl}_3$ ) spectrum of the new compound **16**.

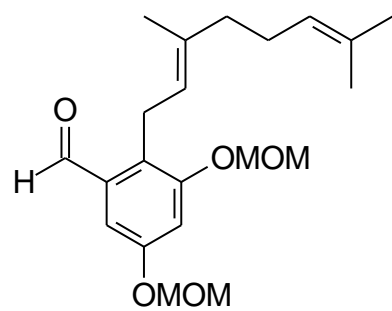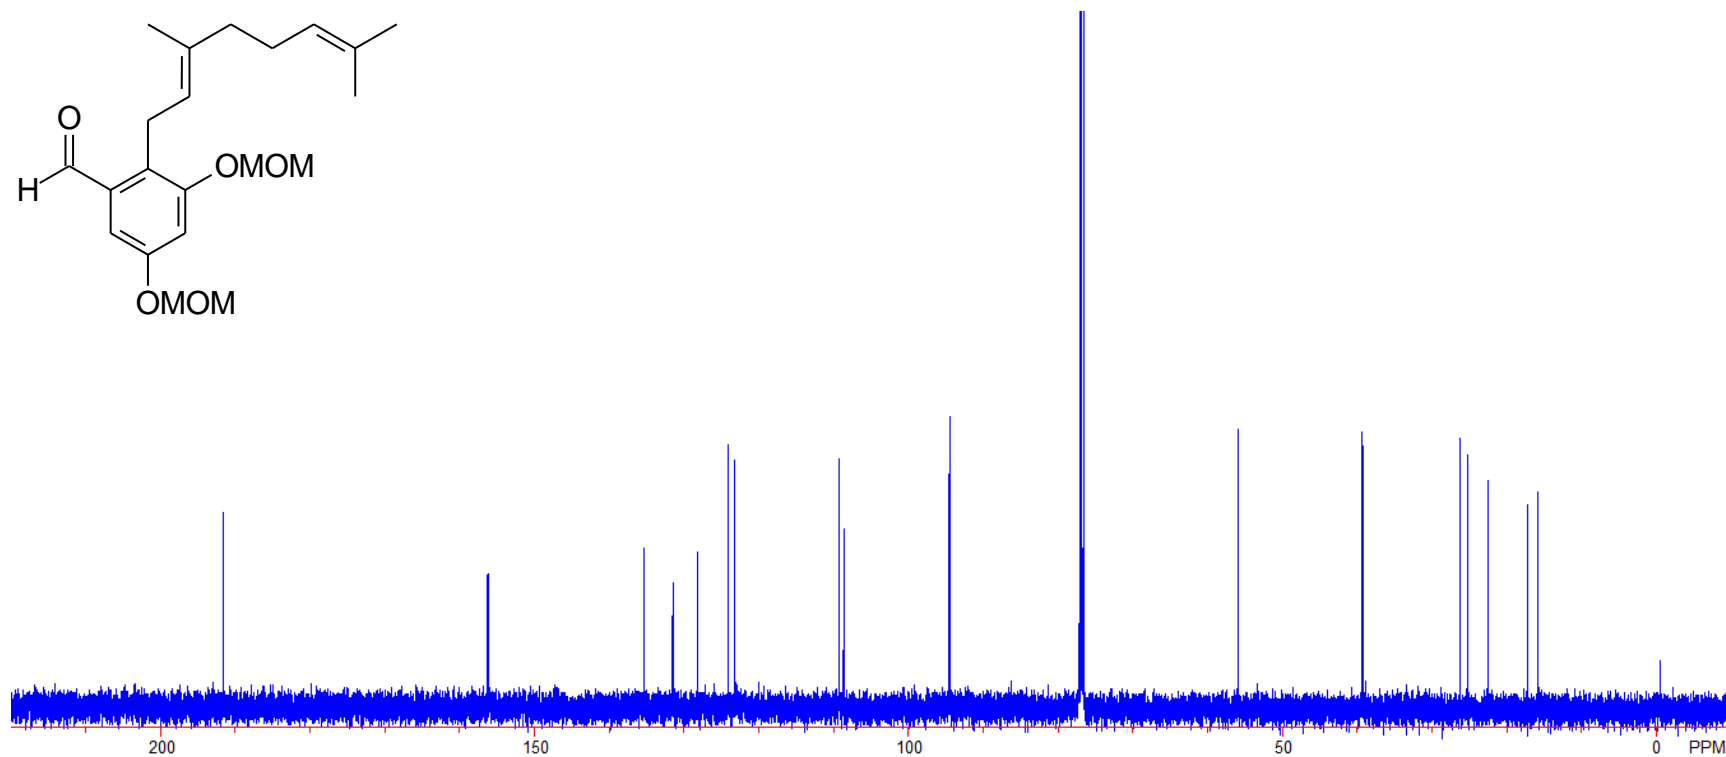

$^{13}\text{C}$  NMR (125 MHz,  $\text{CDCl}_3$ ) spectrum of the new compound **16**.

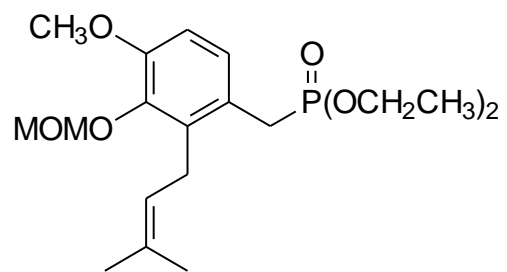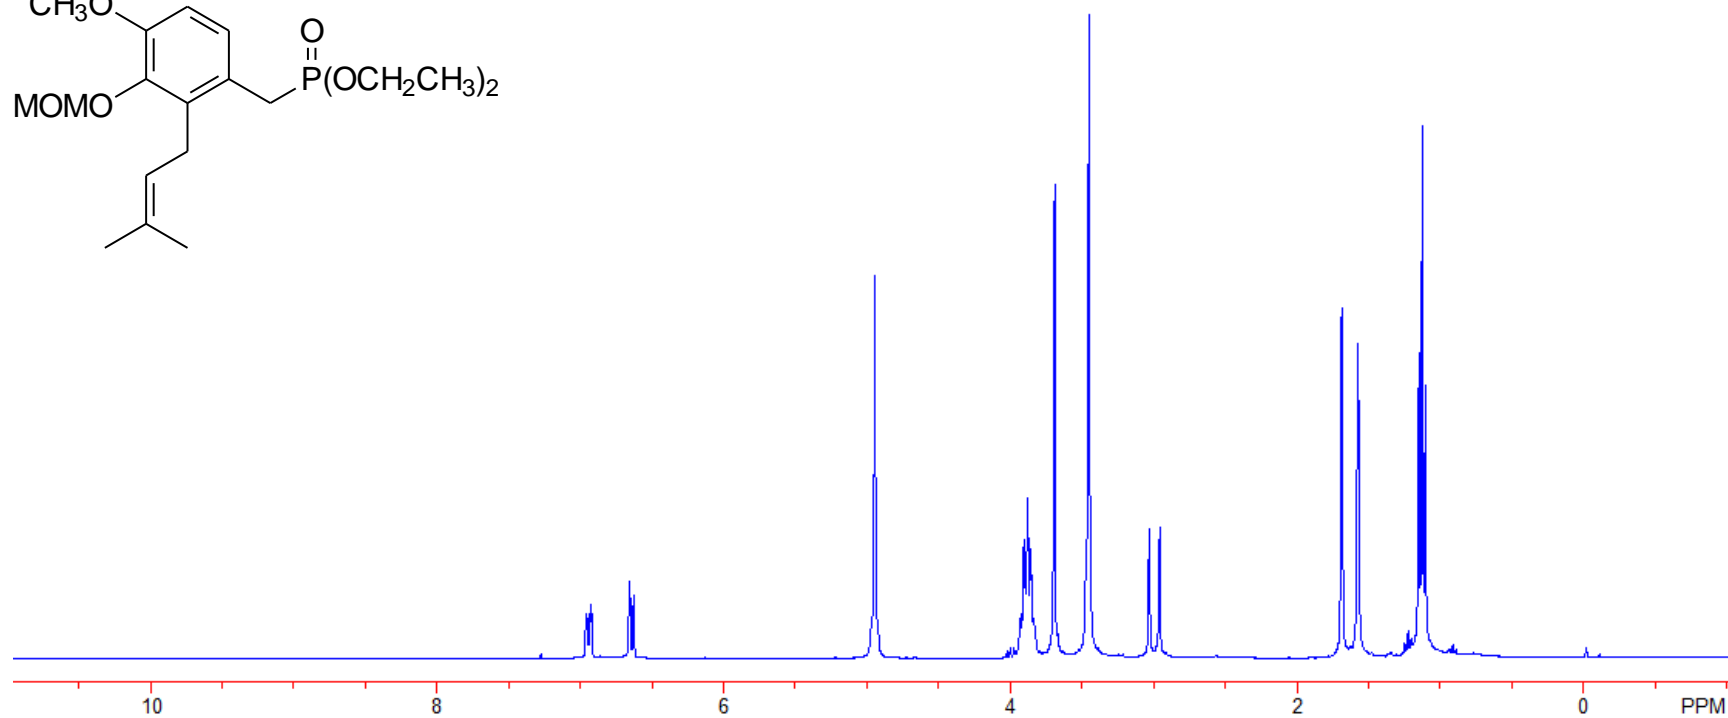

$^1\text{H}$  NMR (300 MHz,  $\text{CDCl}_3$ ) spectrum of the new compound **18**.

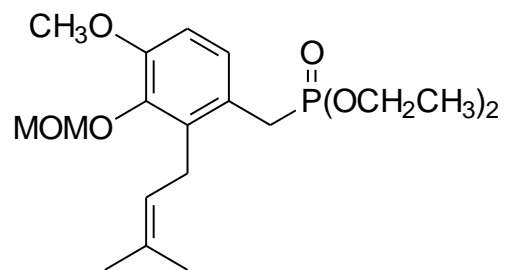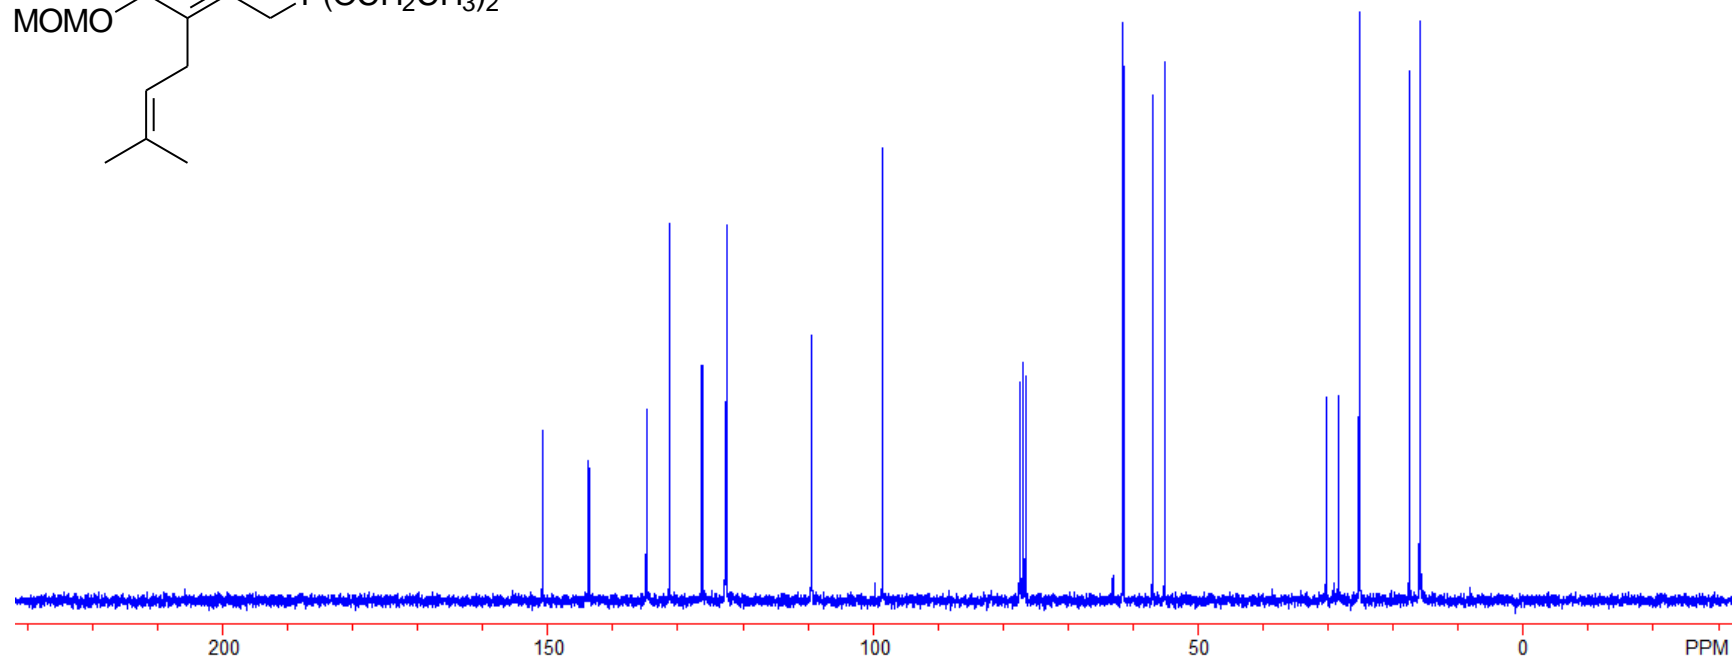

<sup>13</sup>C NMR (75 MHz, CDCl<sub>3</sub>) spectrum of the new compound **18**.



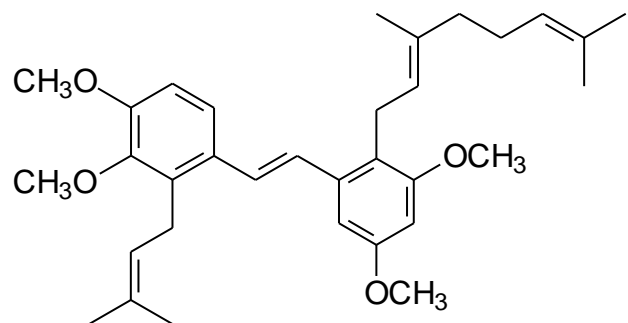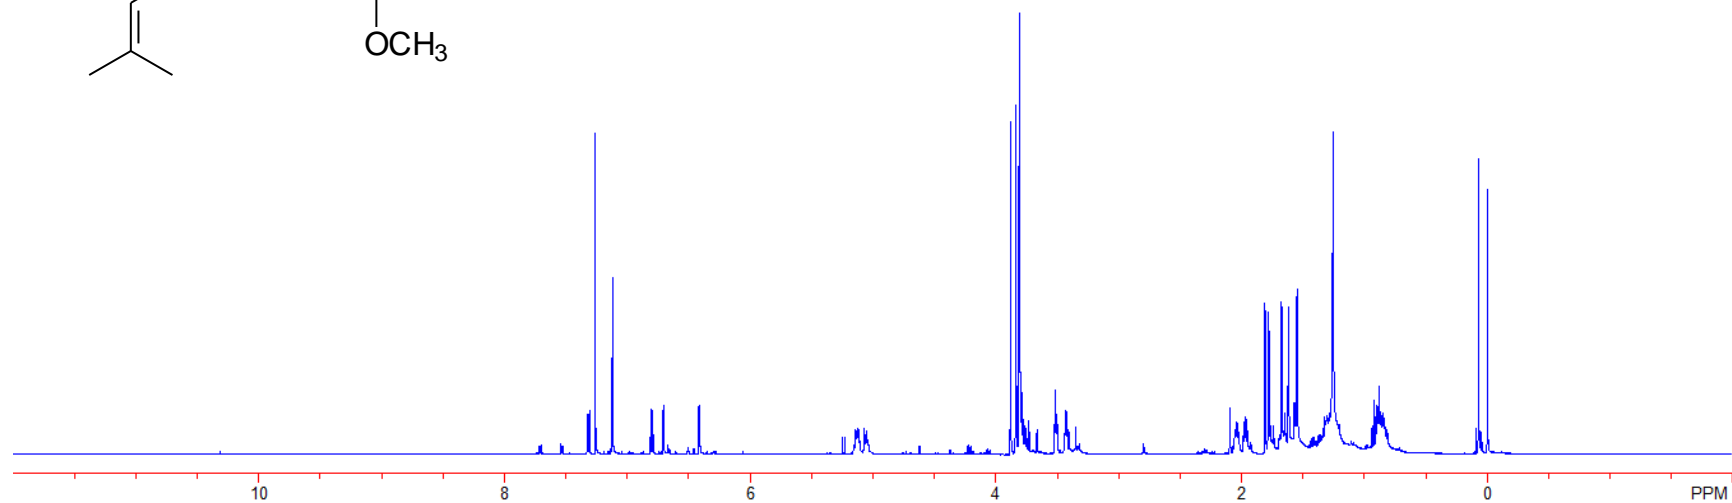

<sup>1</sup>H NMR (500 MHz, CDCl<sub>3</sub>) spectrum of the new compound **20**.

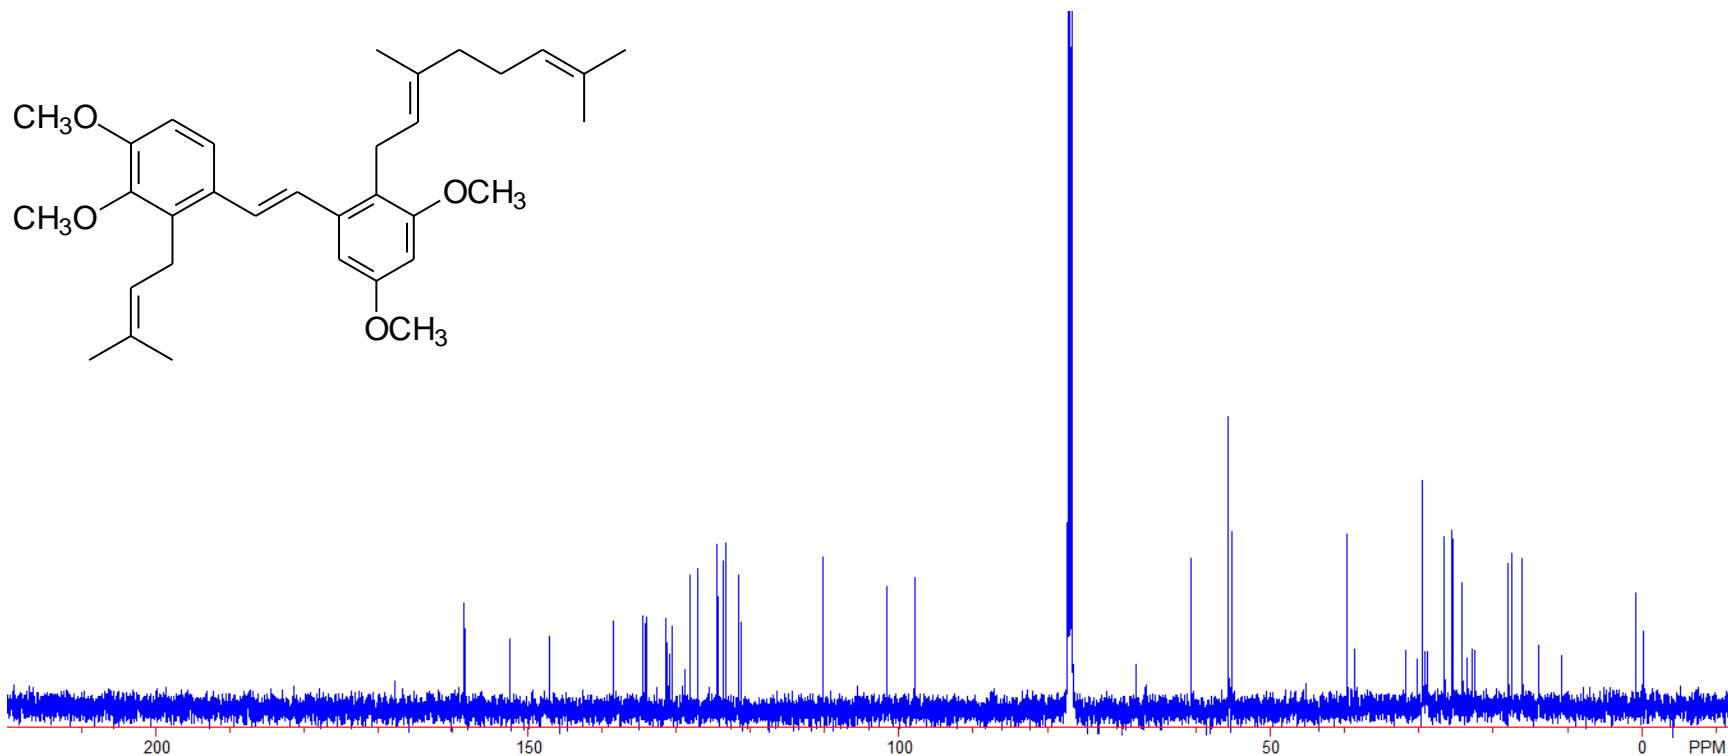

$^{13}\text{C}$  NMR (125 MHz,  $\text{CDCl}_3$ ) spectrum of the new compound **20**.  
Please note, the resonance at 29.7 ppm is indicative of silica oil.

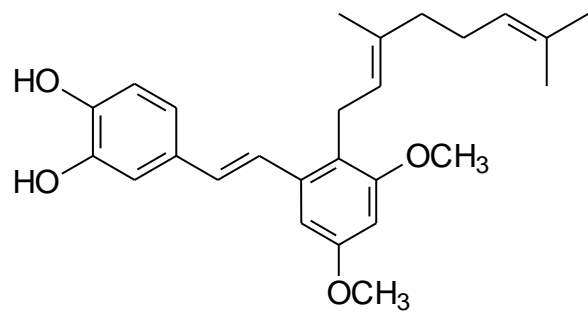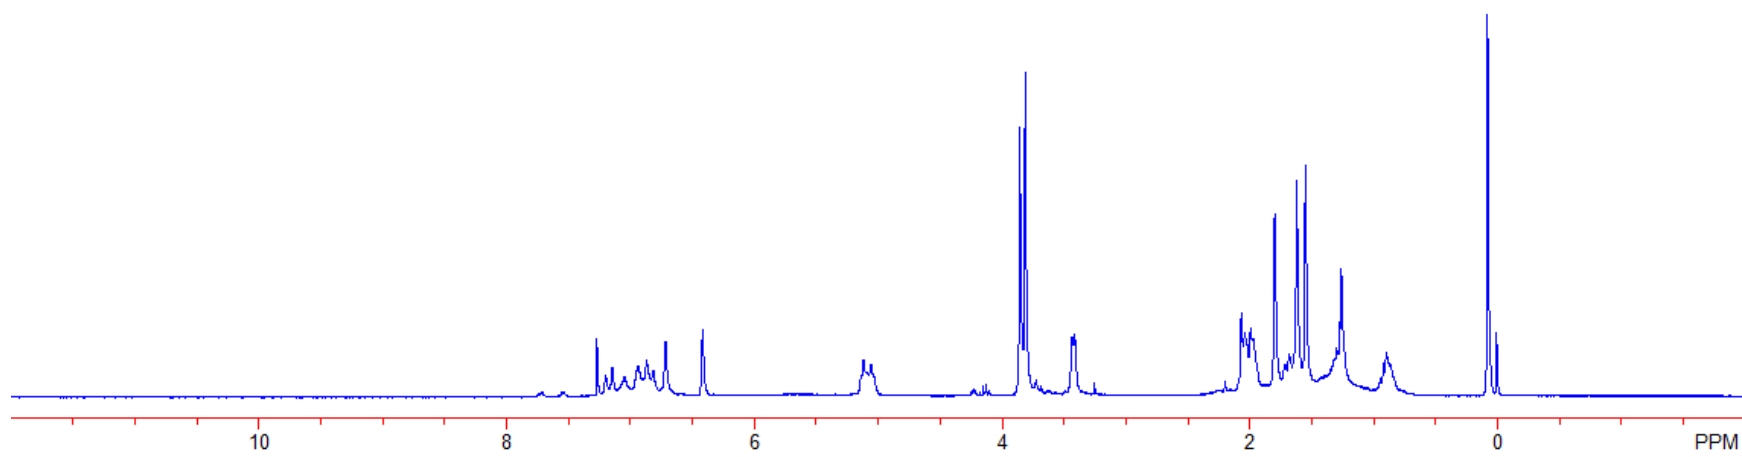

<sup>1</sup>H NMR (300 MHz, CDCl<sub>3</sub>) spectrum of the new compound **23**.

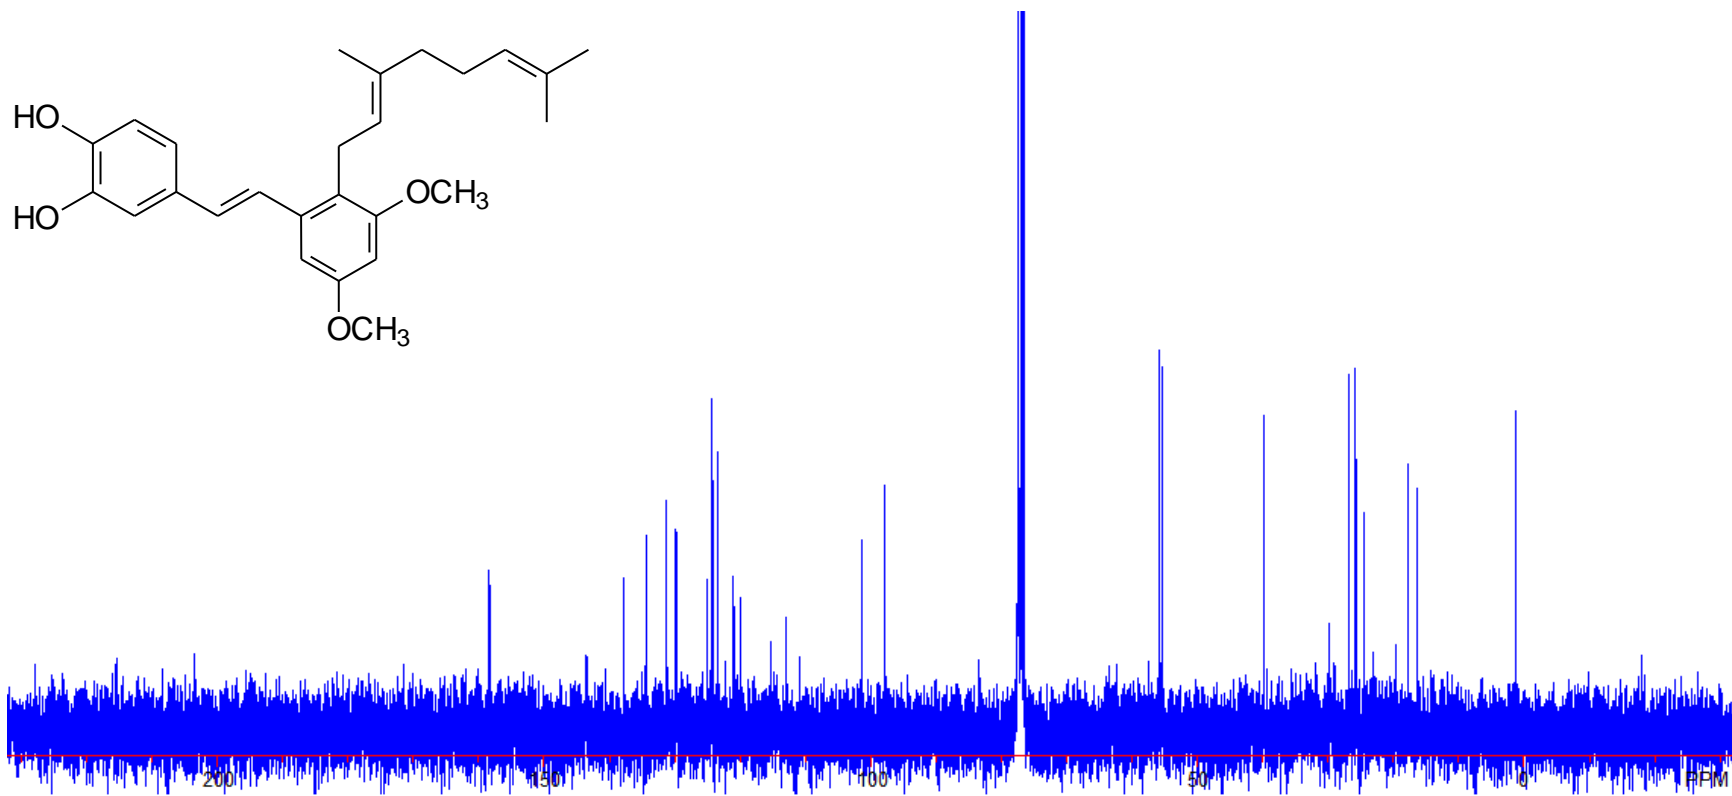

$^{13}\text{C}$  NMR (75 MHz,  $\text{CDCl}_3$ ) spectrum of the new compound **23**.

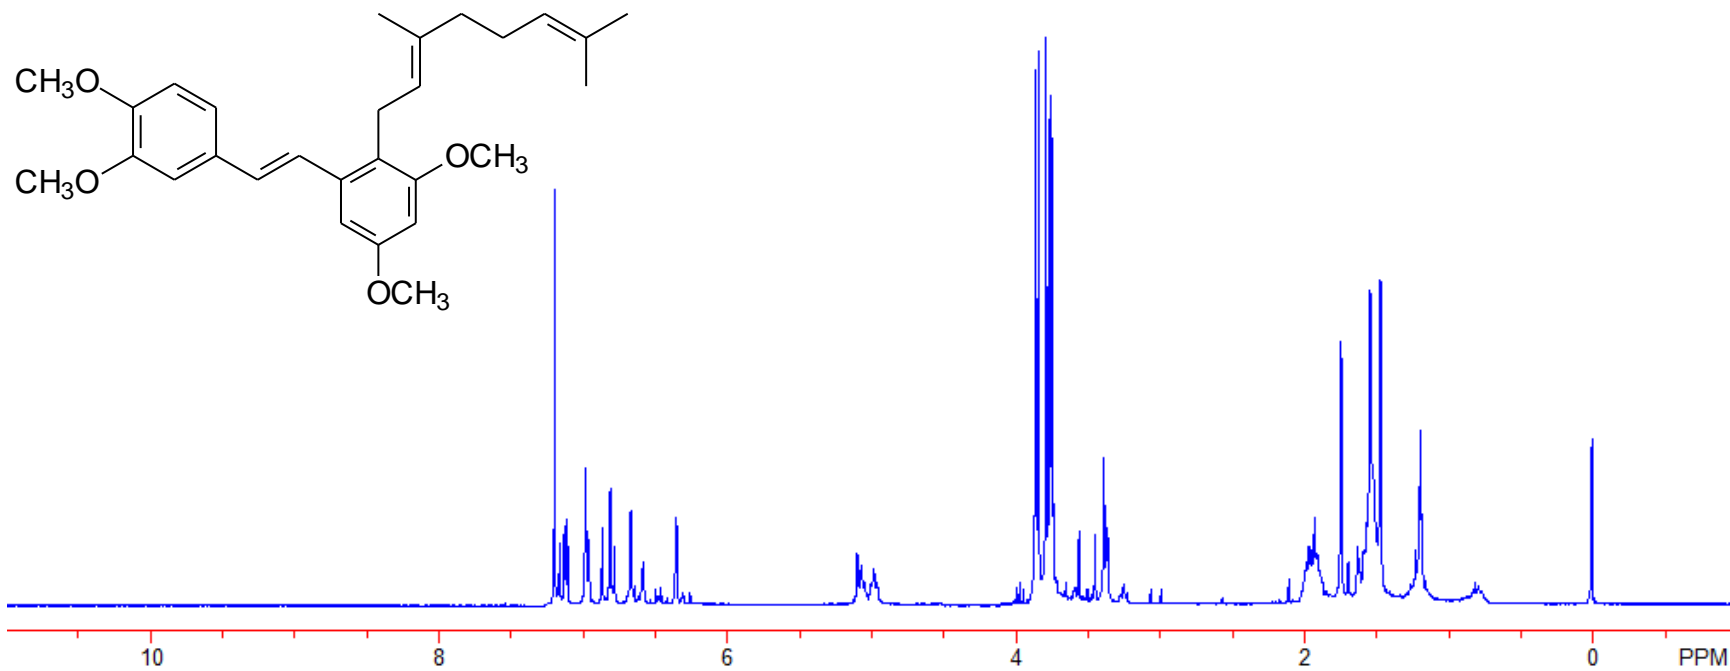

$^1\text{H}$  NMR (300 MHz,  $\text{CDCl}_3$ ) spectrum of the new compound **24**.

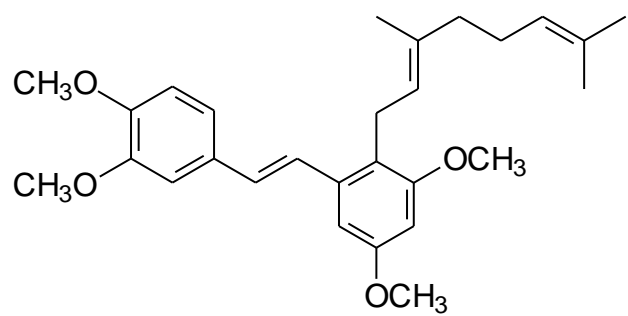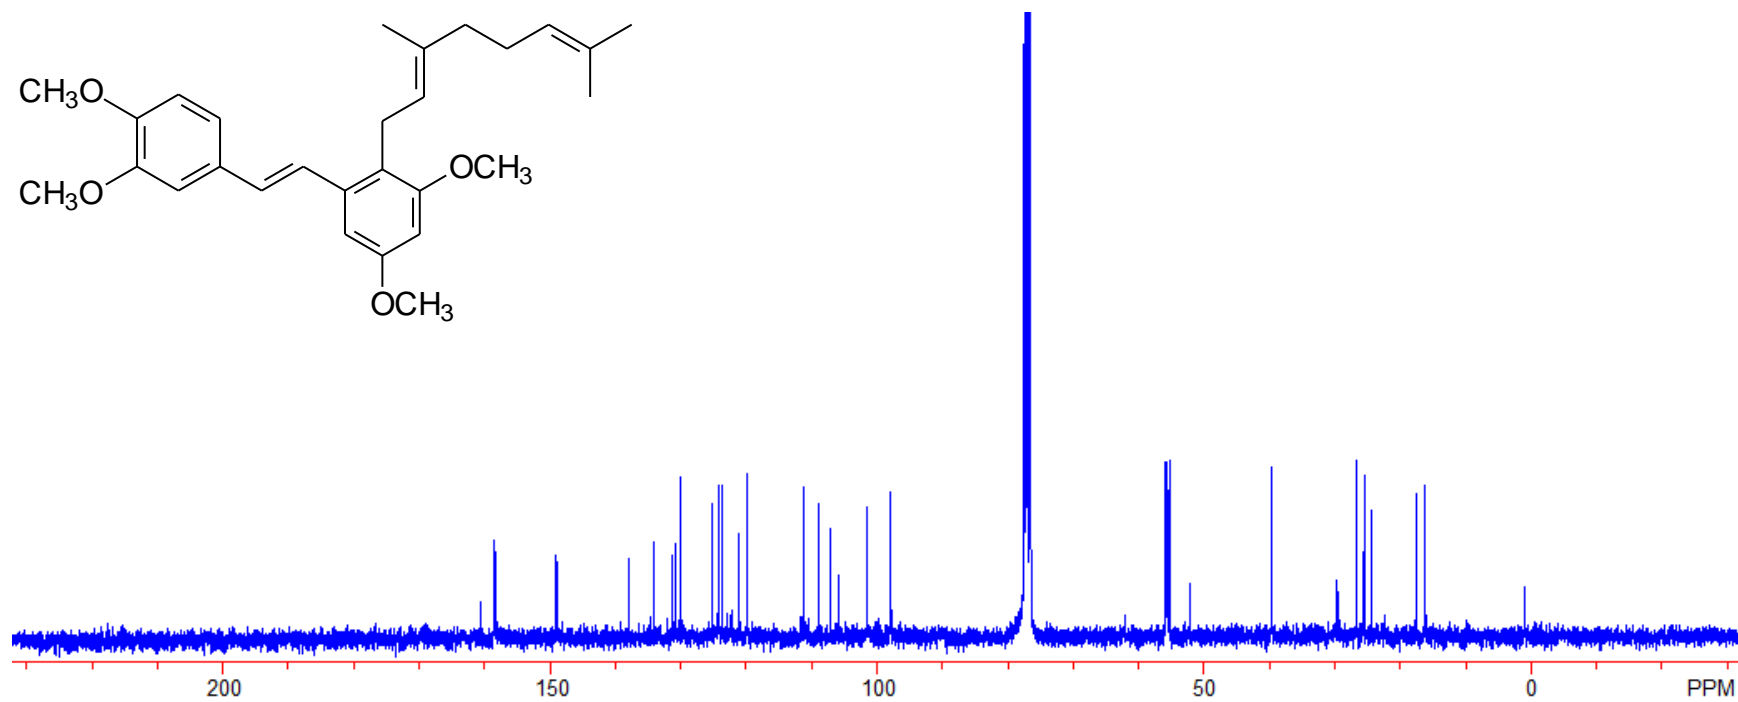

$^{13}\text{C}$  NMR (75 MHz,  $\text{CDCl}_3$ ) spectrum of the new compound **24**.

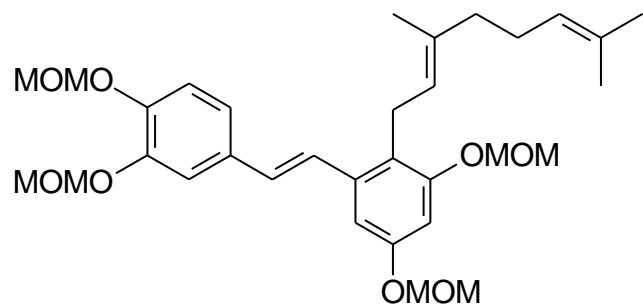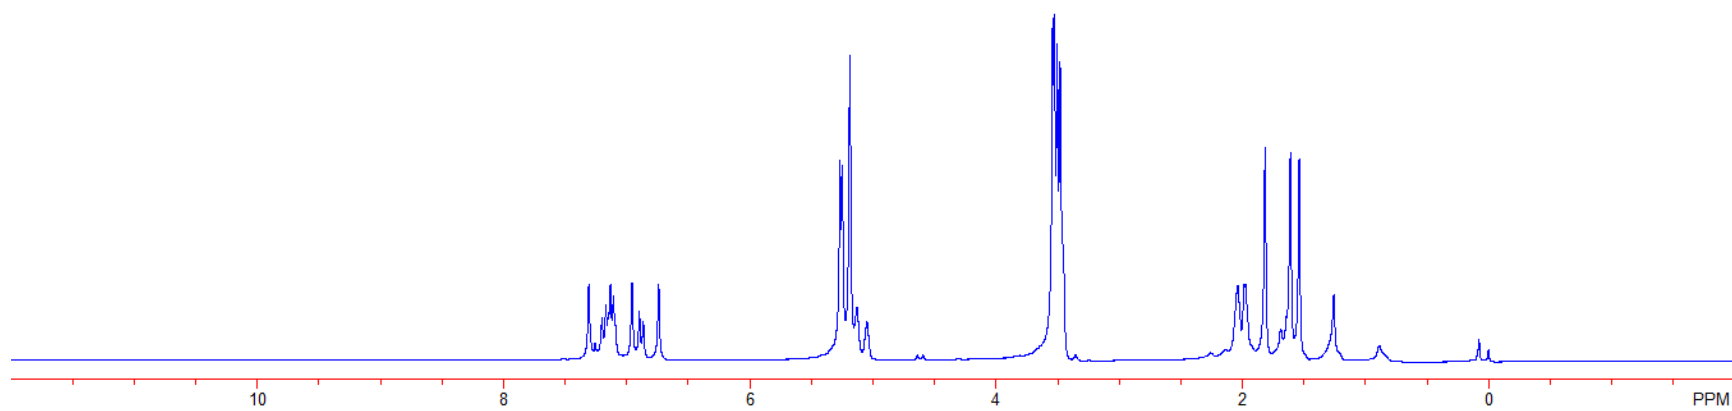

$^1\text{H}$  NMR (500 MHz,  $\text{CDCl}_3$ ) spectrum of the new compound **25**.

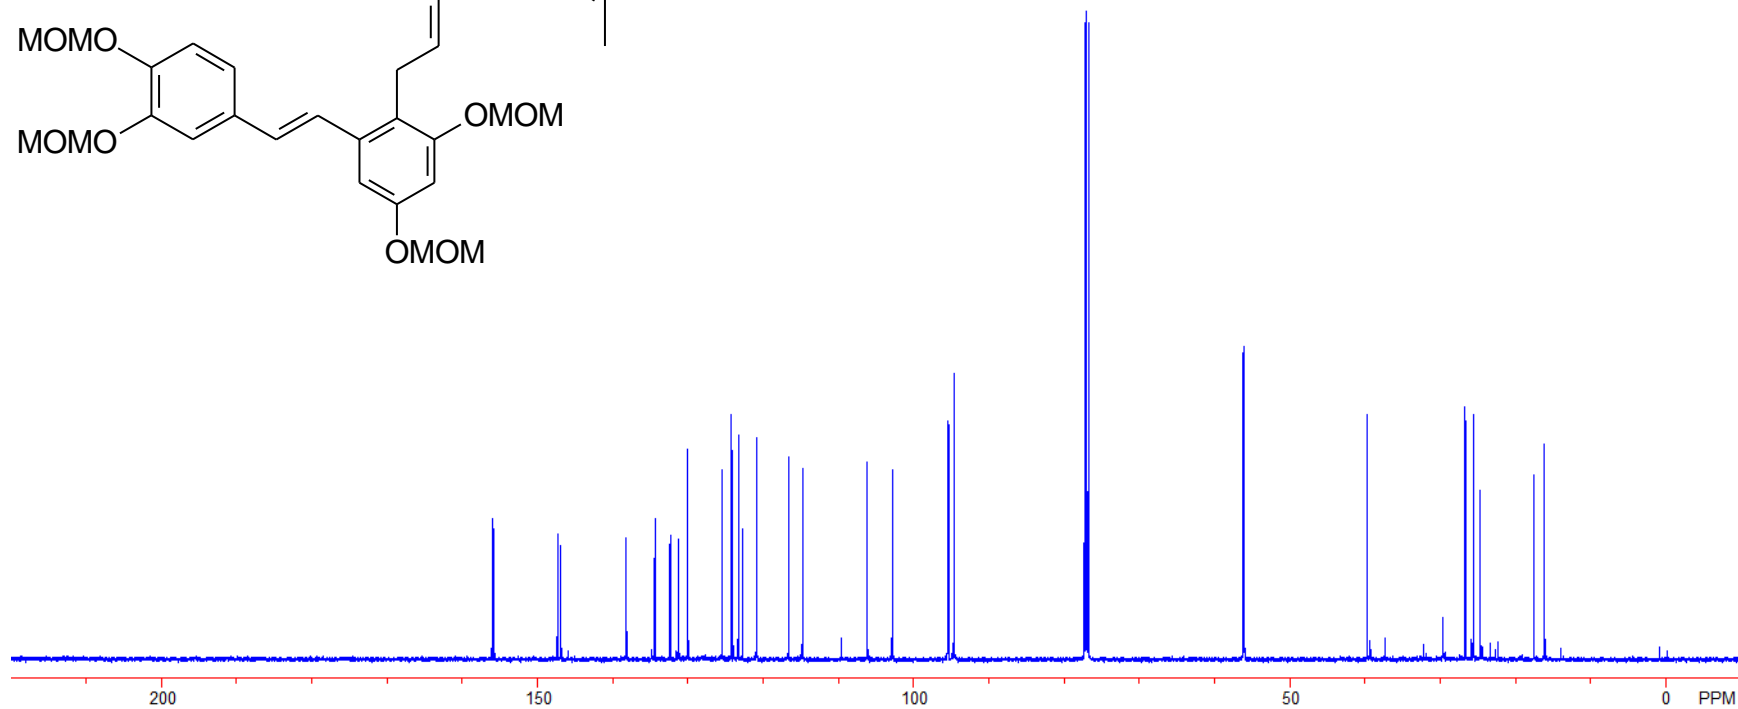

$^{13}\text{C}$  NMR (125 MHz,  $\text{CDCl}_3$ ) spectrum of the new compound **25**.



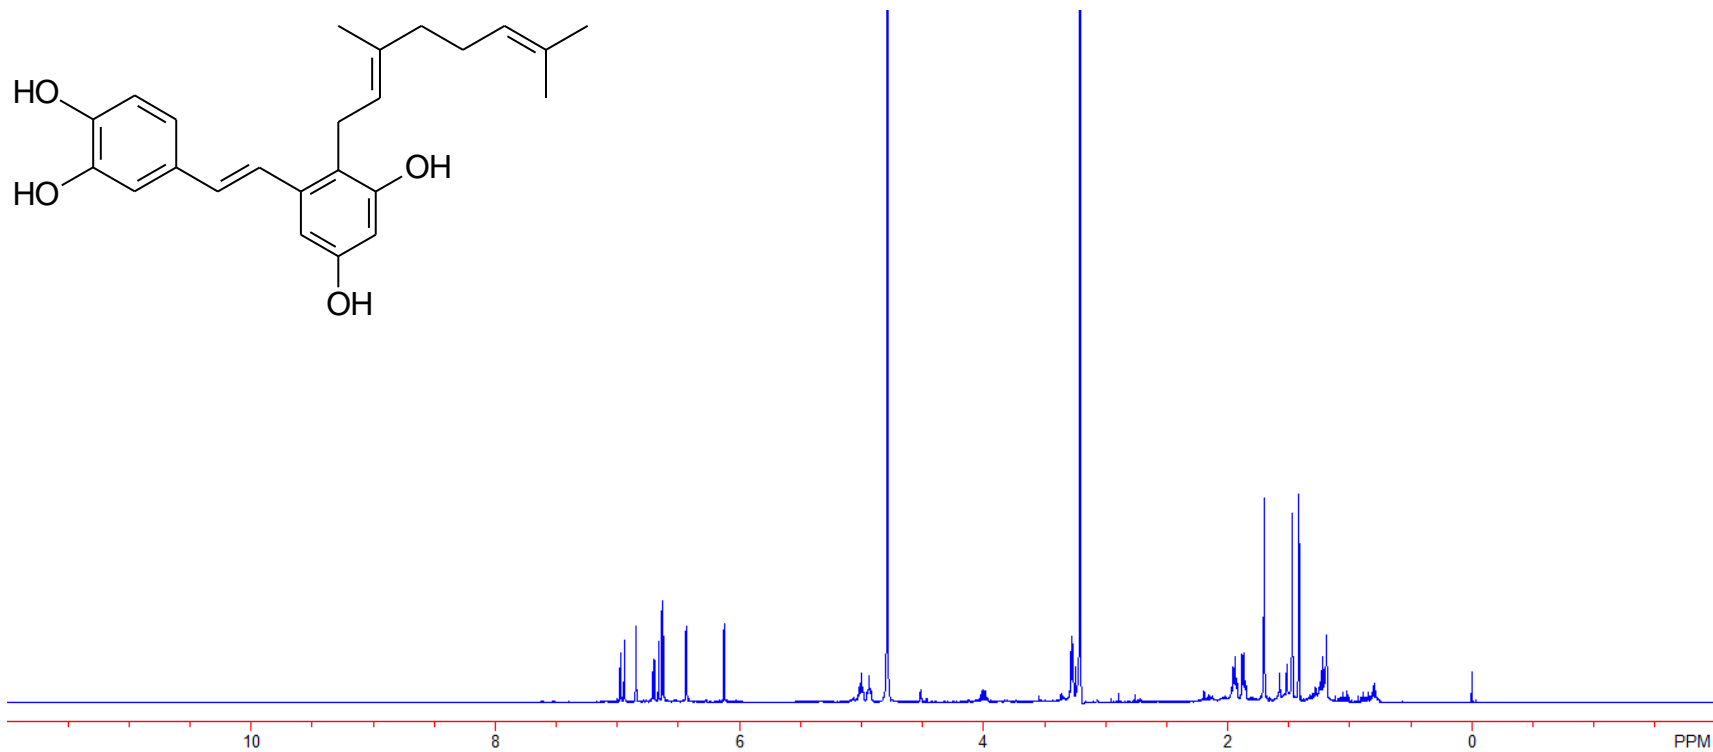

$^1\text{H}$  NMR (500 MHz,  $\text{CD}_3\text{OD}$ ) spectrum of the new compound **26**.

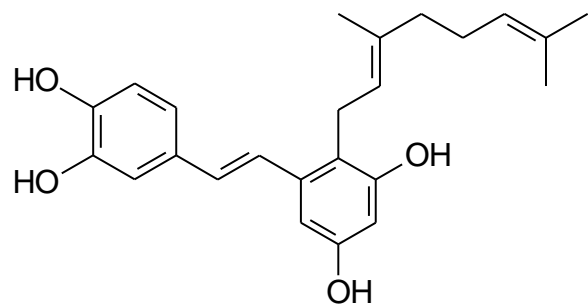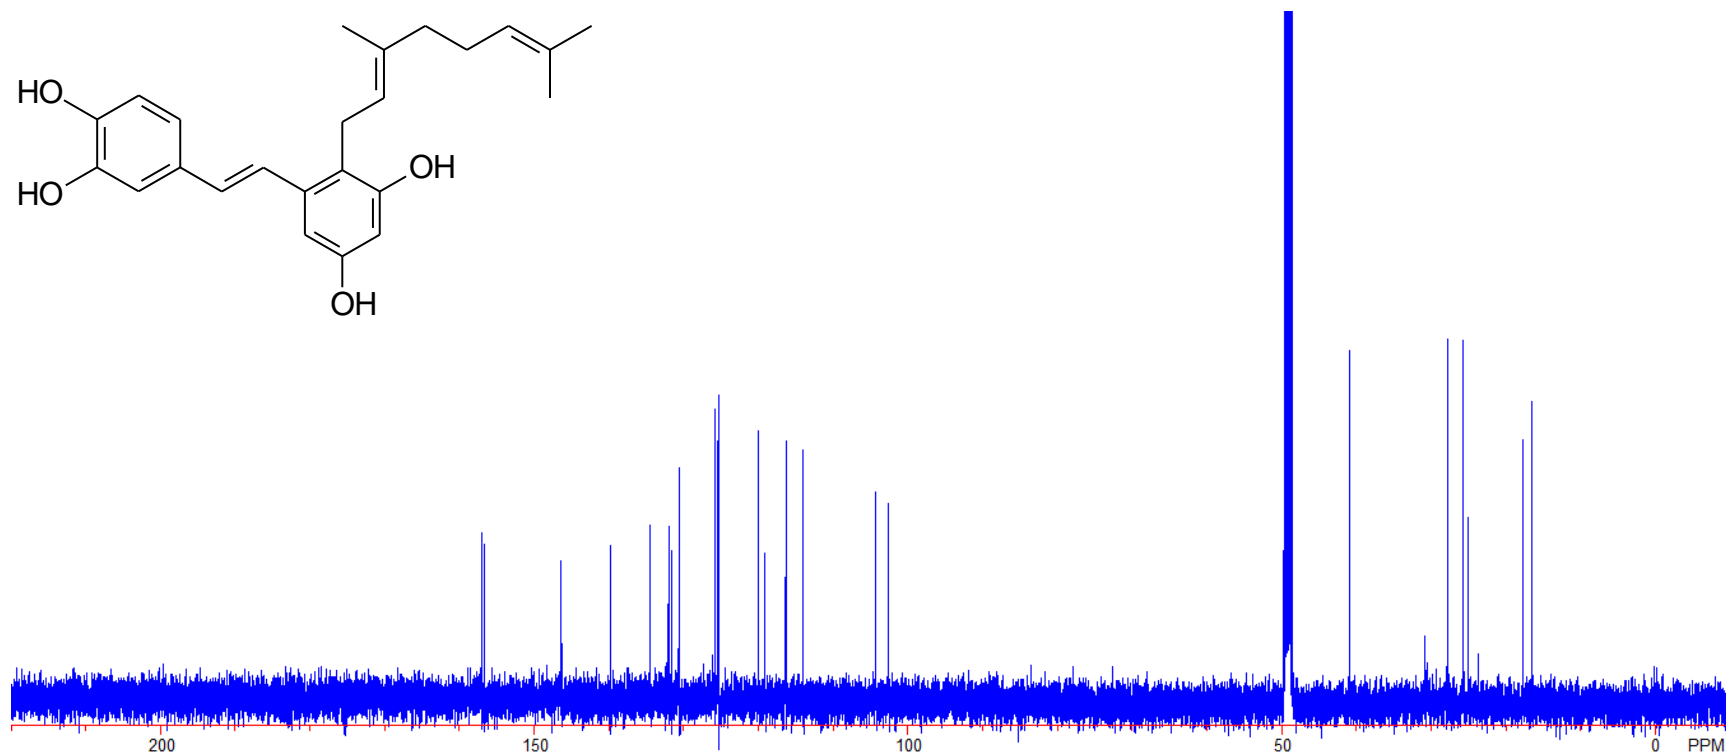

$^{13}\text{C}$  NMR (125 MHz,  $\text{CD}_3\text{OD}$ ) spectrum of the new compound **26**.

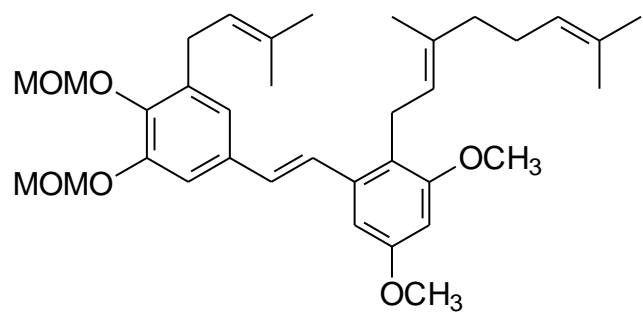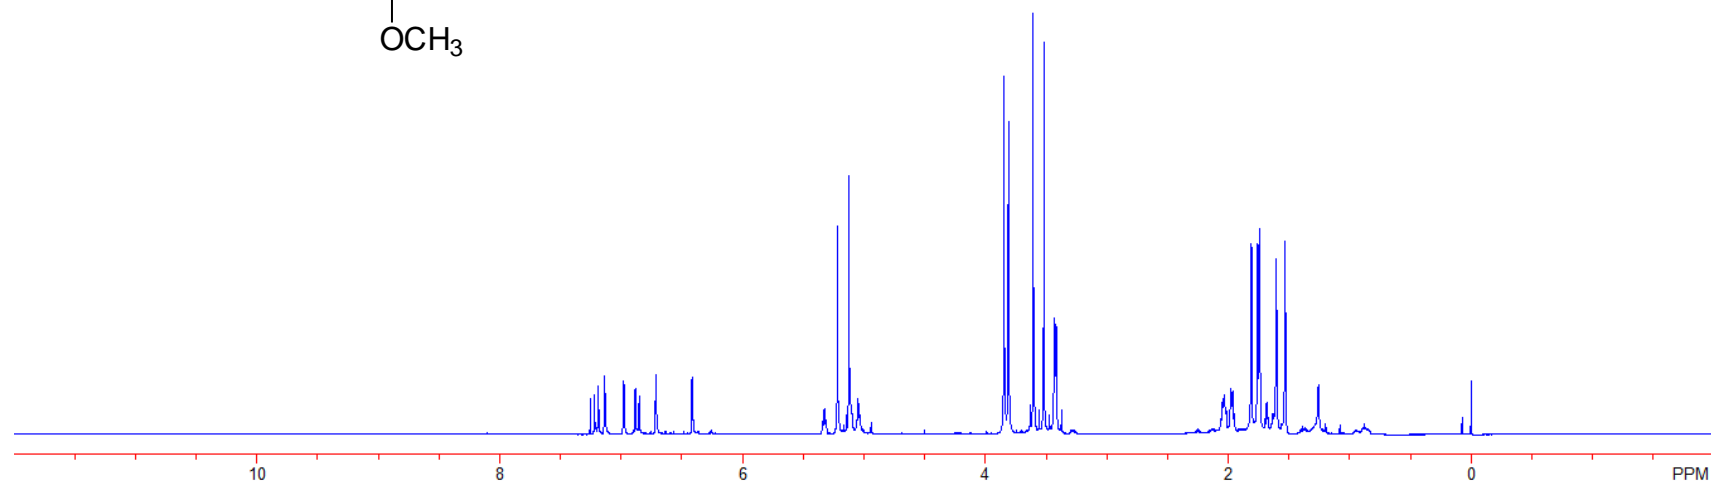

<sup>1</sup>H NMR (500 MHz, CDCl<sub>3</sub>) spectrum of the new compound **28**.

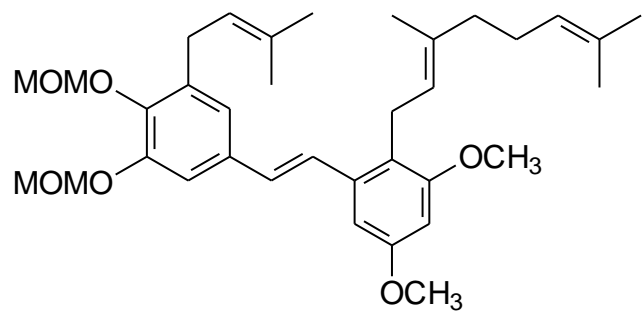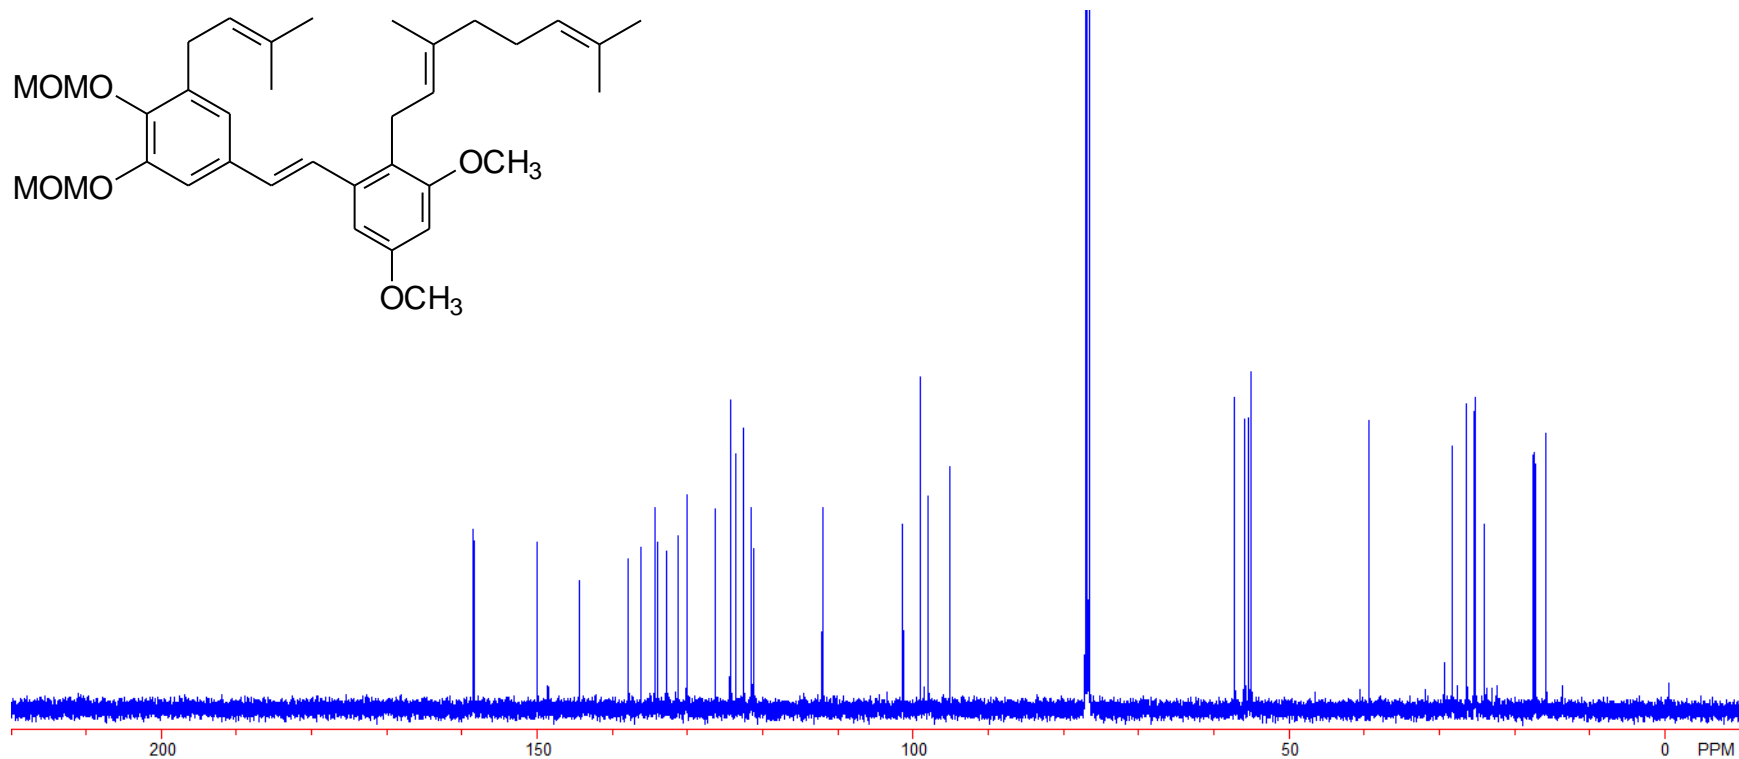

<sup>13</sup>C NMR (125 MHz, CDCl<sub>3</sub>) spectrum of the new compound **28**.

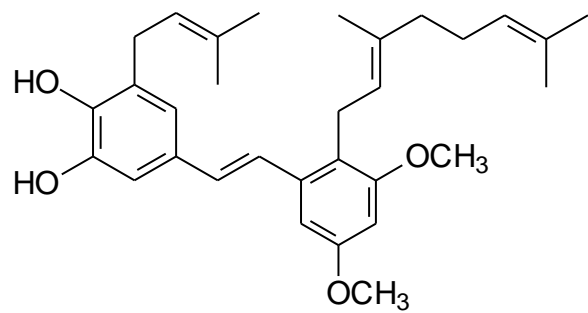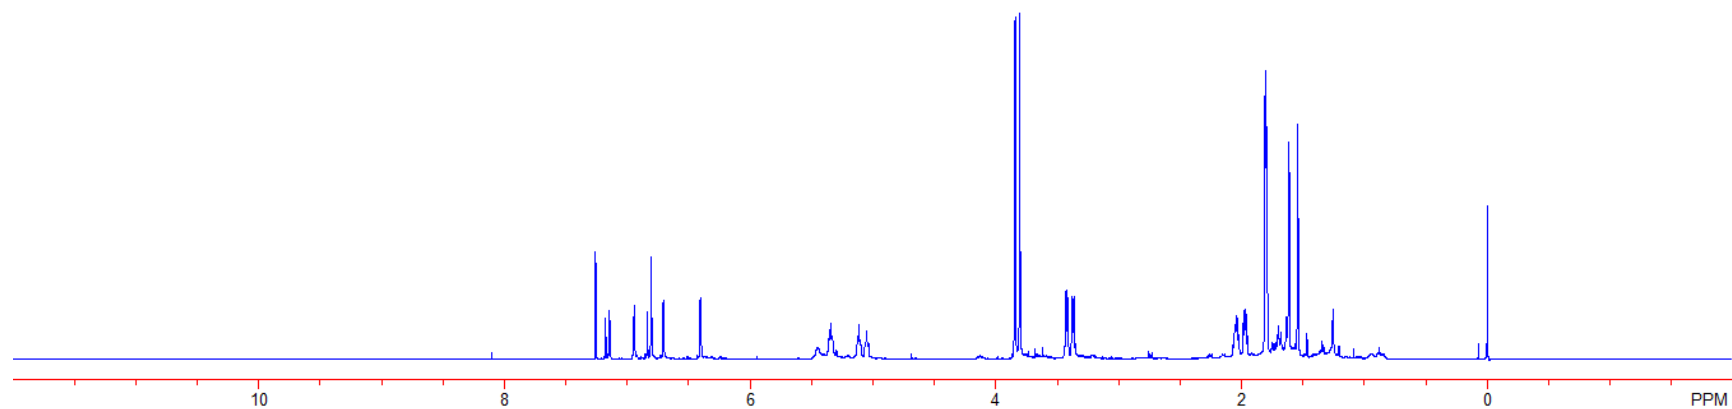

$^1\text{H}$  NMR (500 MHz,  $\text{CDCl}_3$ ) spectrum of the new compound **29**.

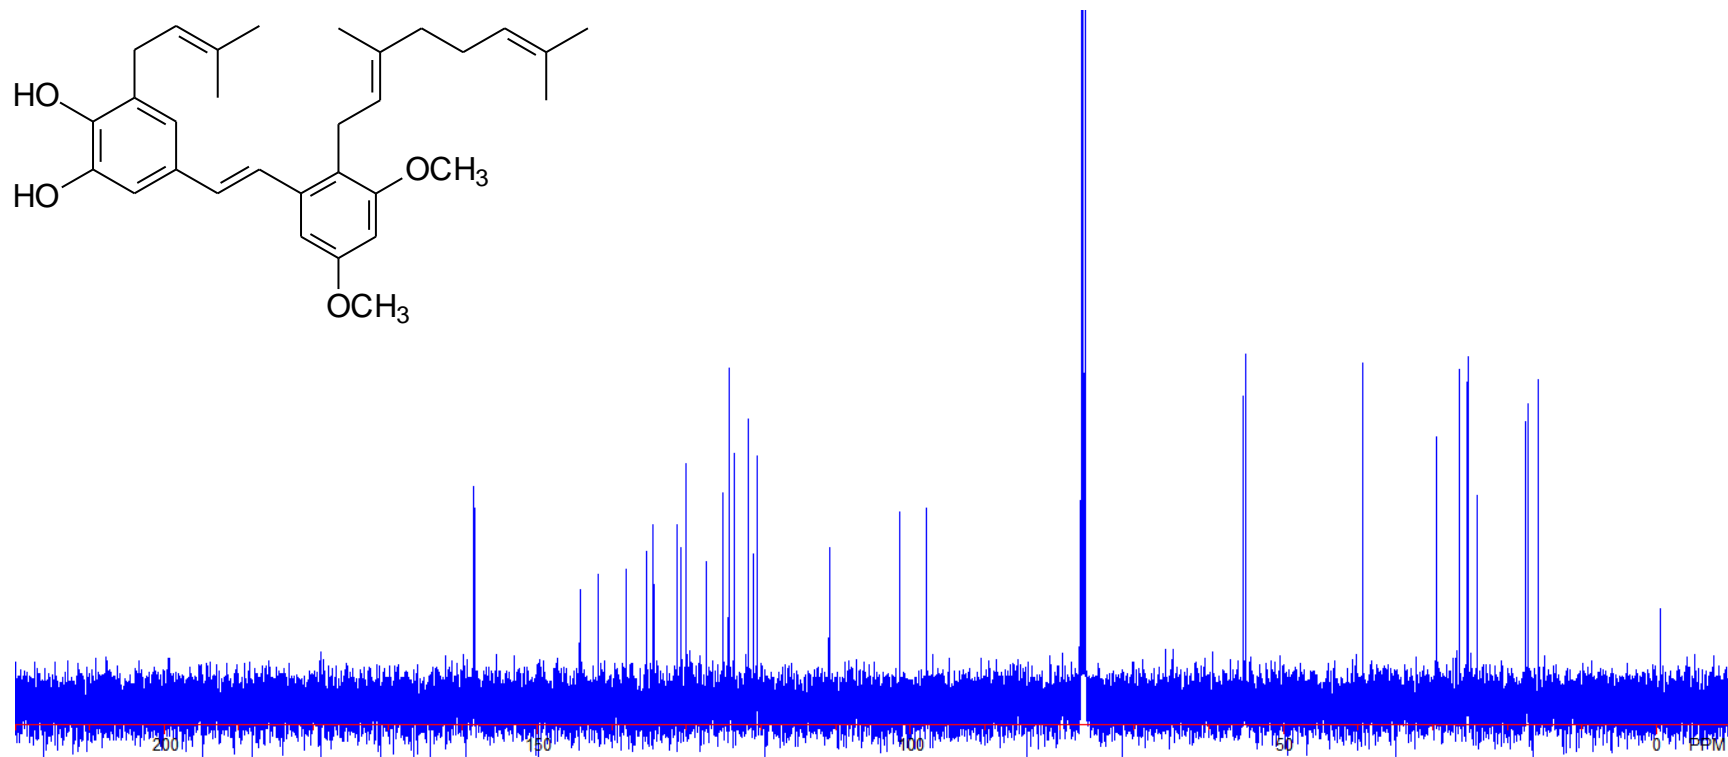

$^{13}\text{C}$  NMR (125 MHz,  $\text{CDCl}_3$ ) spectrum of the new compound **29**.

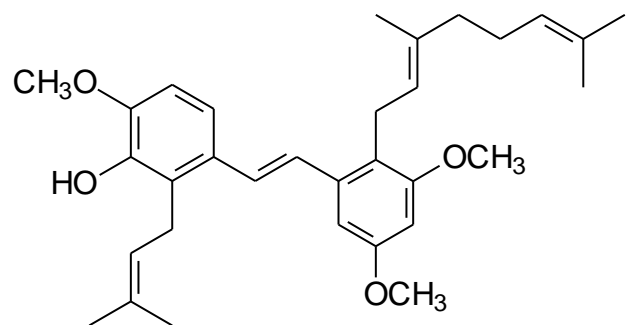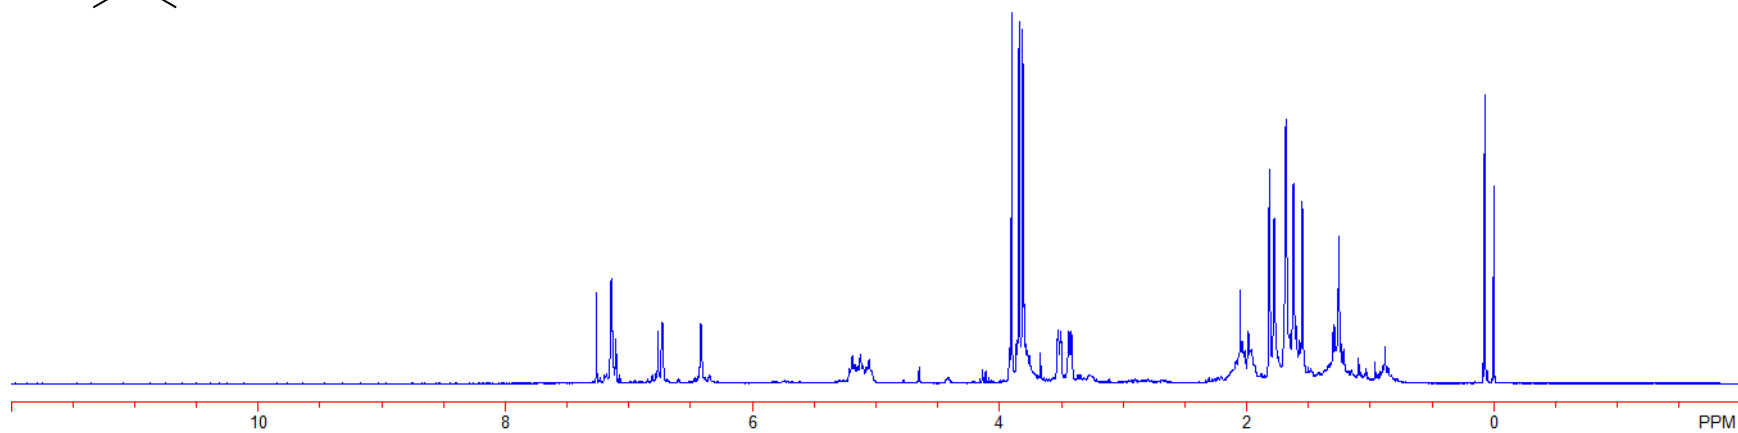

<sup>1</sup>H NMR (300 MHz, CDCl<sub>3</sub>) spectrum of the new compound **31**.

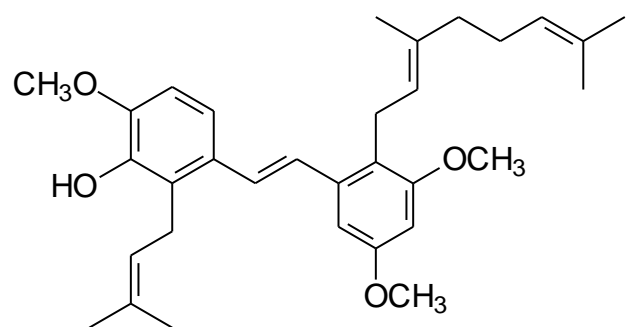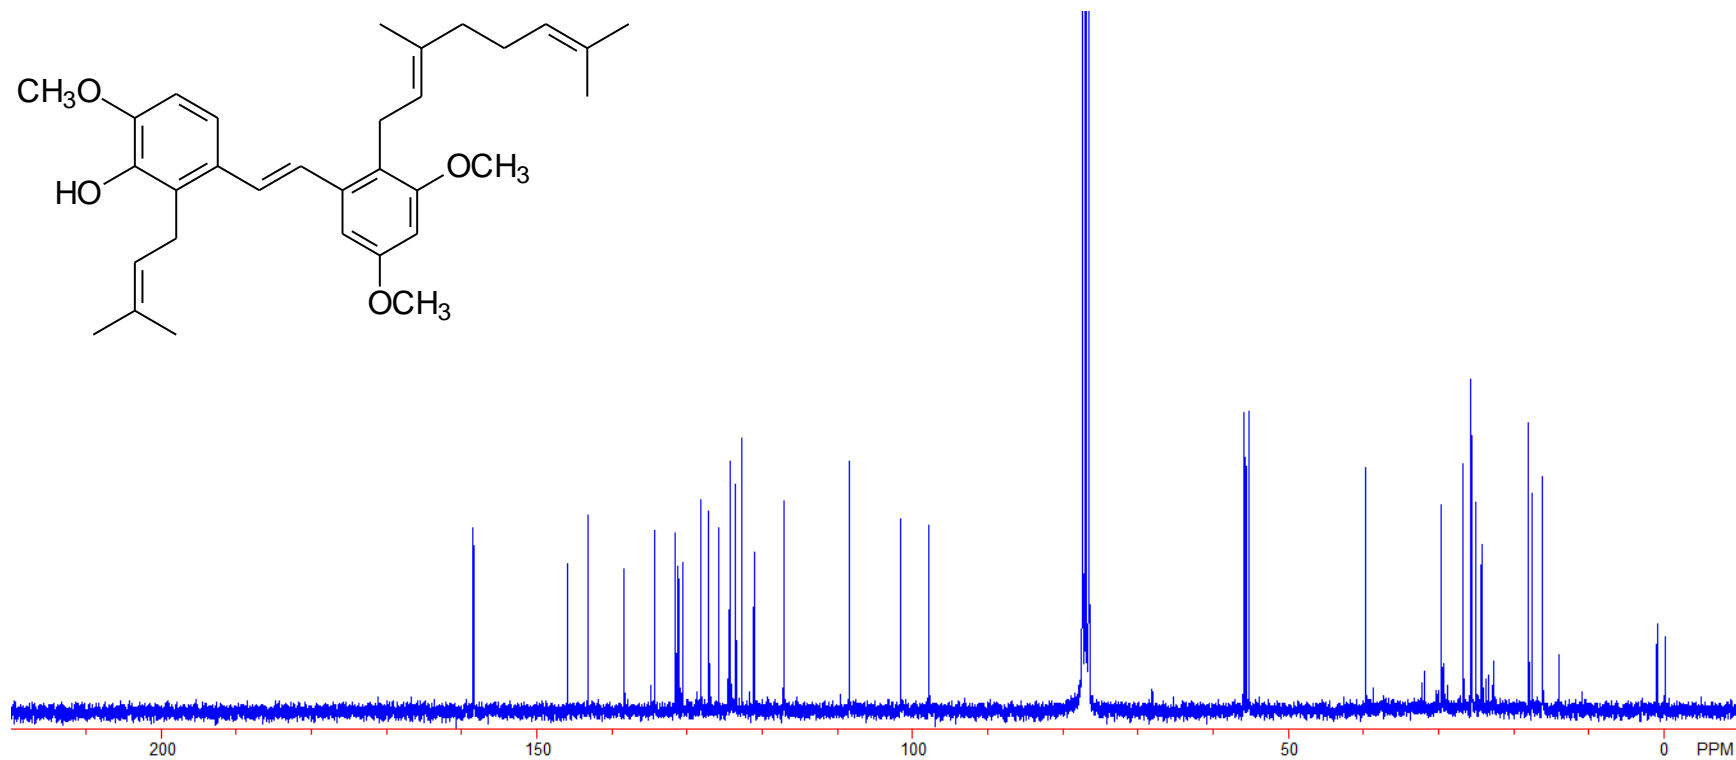

<sup>13</sup>C NMR (75 MHz, CDCl<sub>3</sub>) spectrum of the new compound **31**.  
Please note, the resonance at 29.7 ppm is indicative of silica oil.



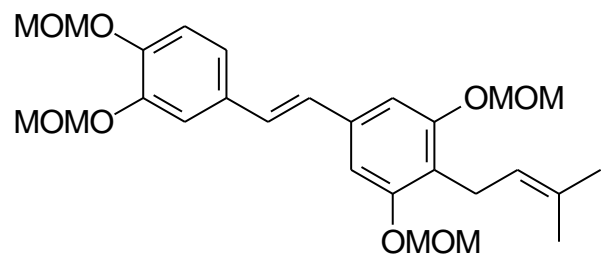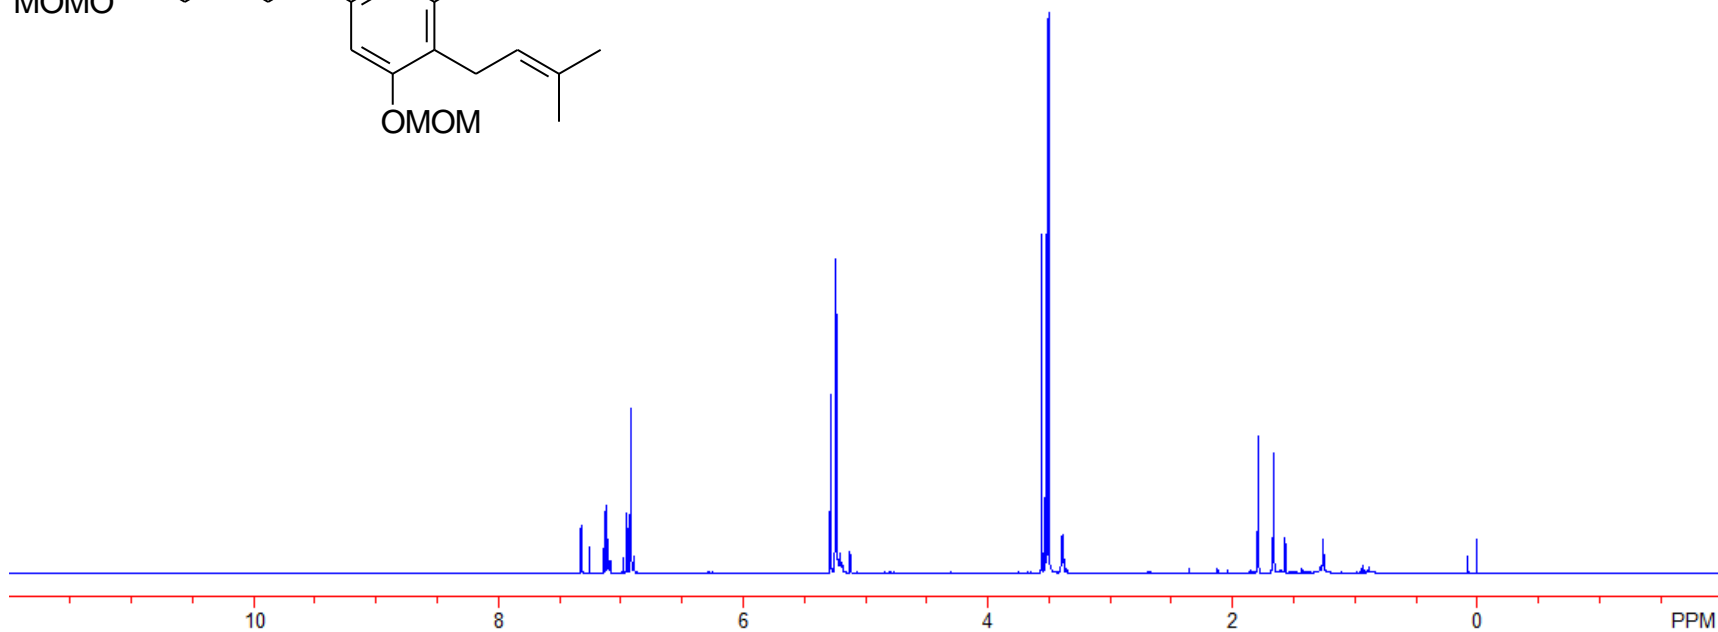

$^1\text{H}$  NMR (500 MHz,  $\text{CDCl}_3$ ) spectrum of the new compound **36**.

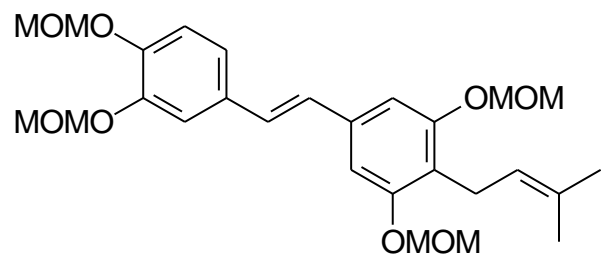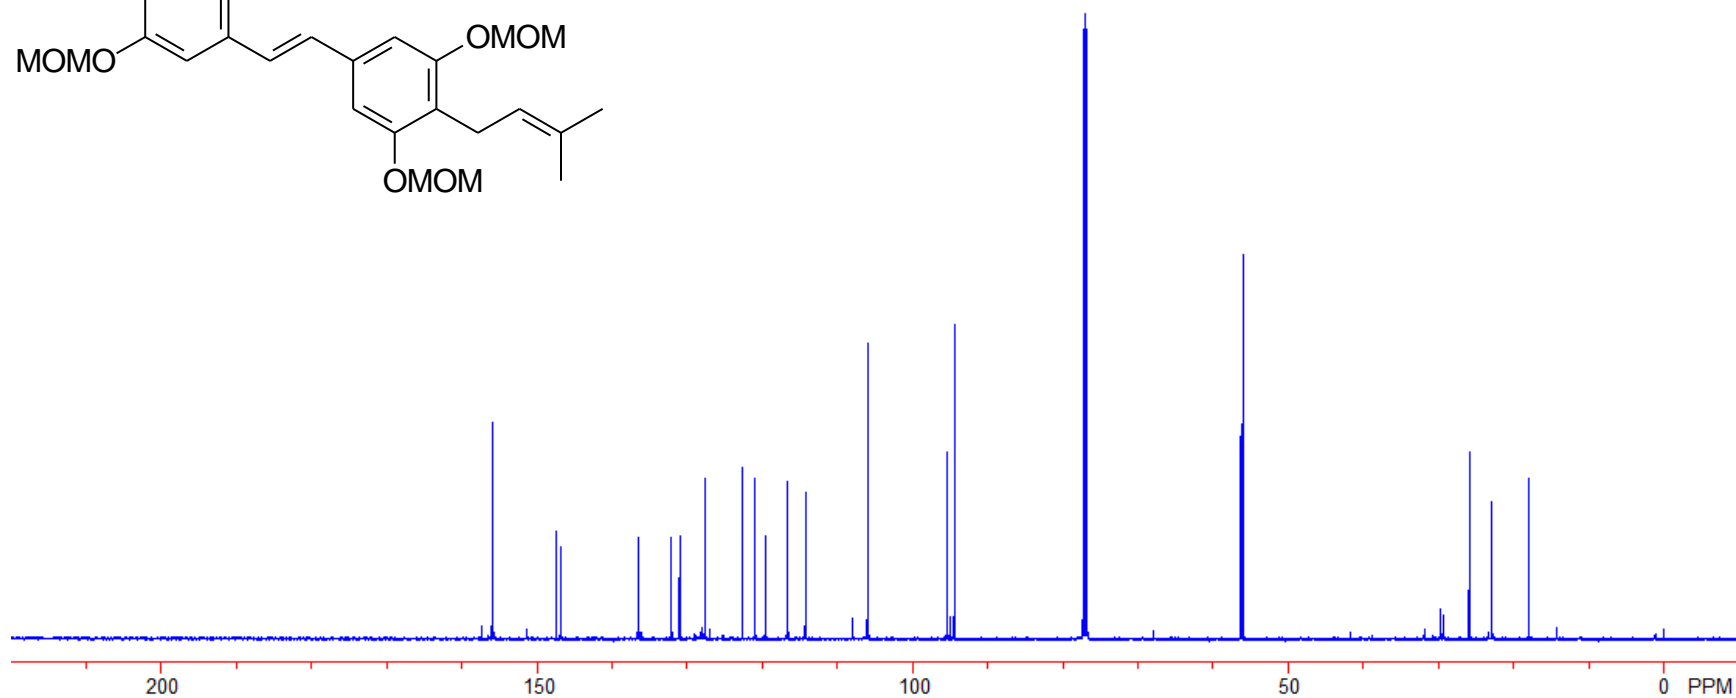

$^{13}\text{C}$  NMR (125 MHz,  $\text{CDCl}_3$ ) spectrum of the new compound **36**.

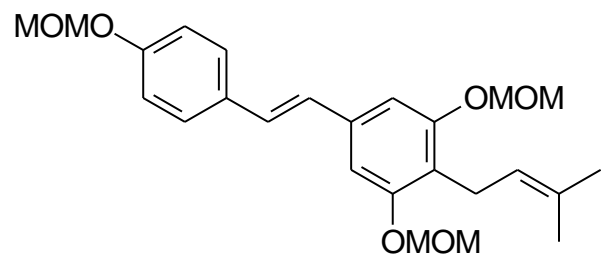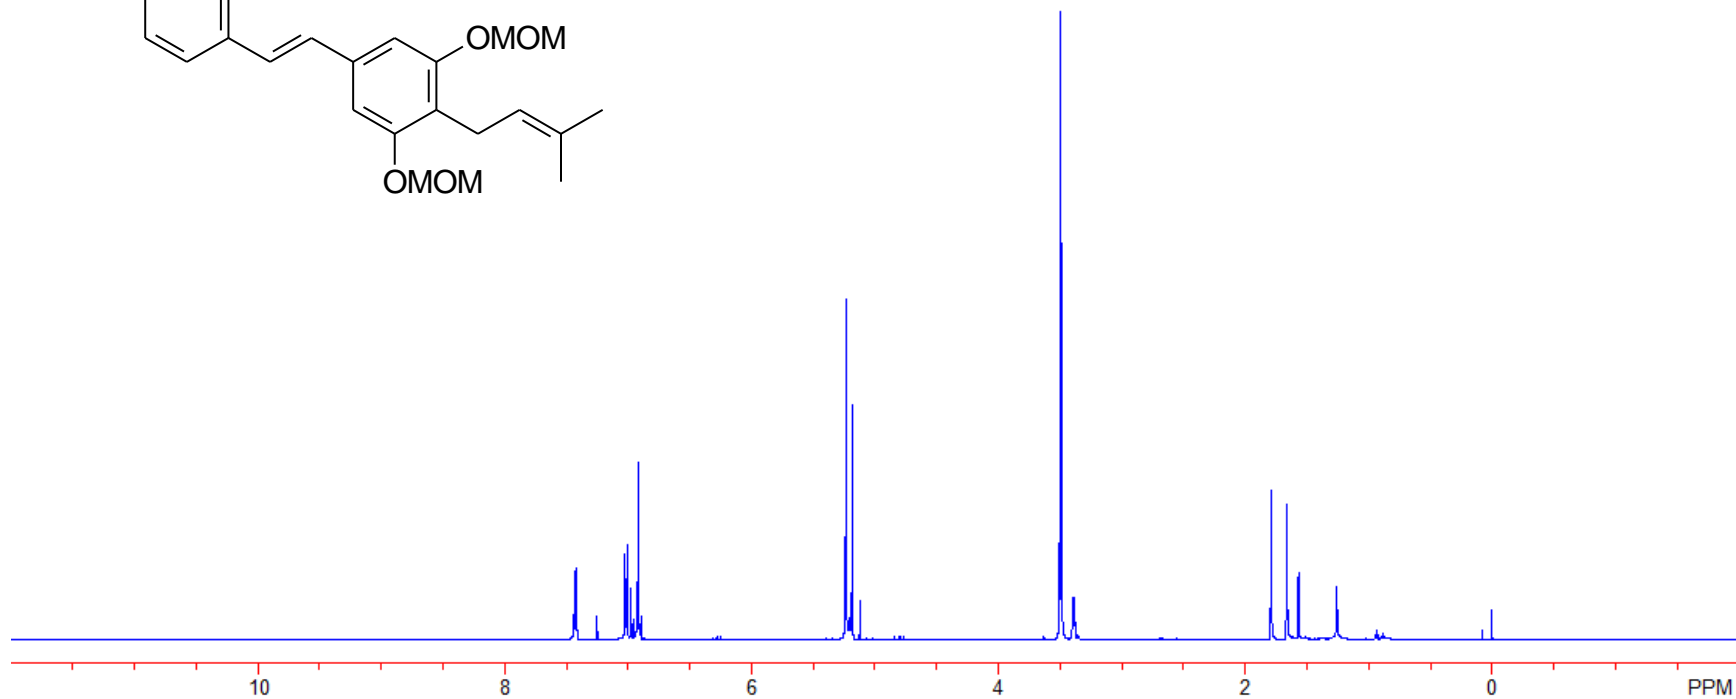

$^1\text{H}$  NMR (500 MHz,  $\text{CDCl}_3$ ) spectrum of the new compound **38**.

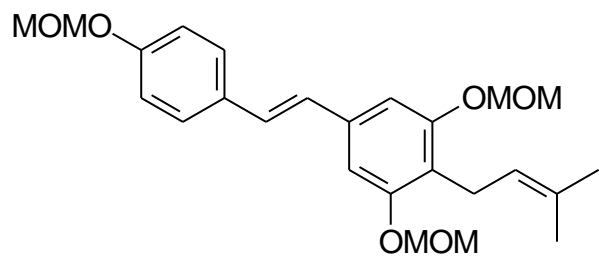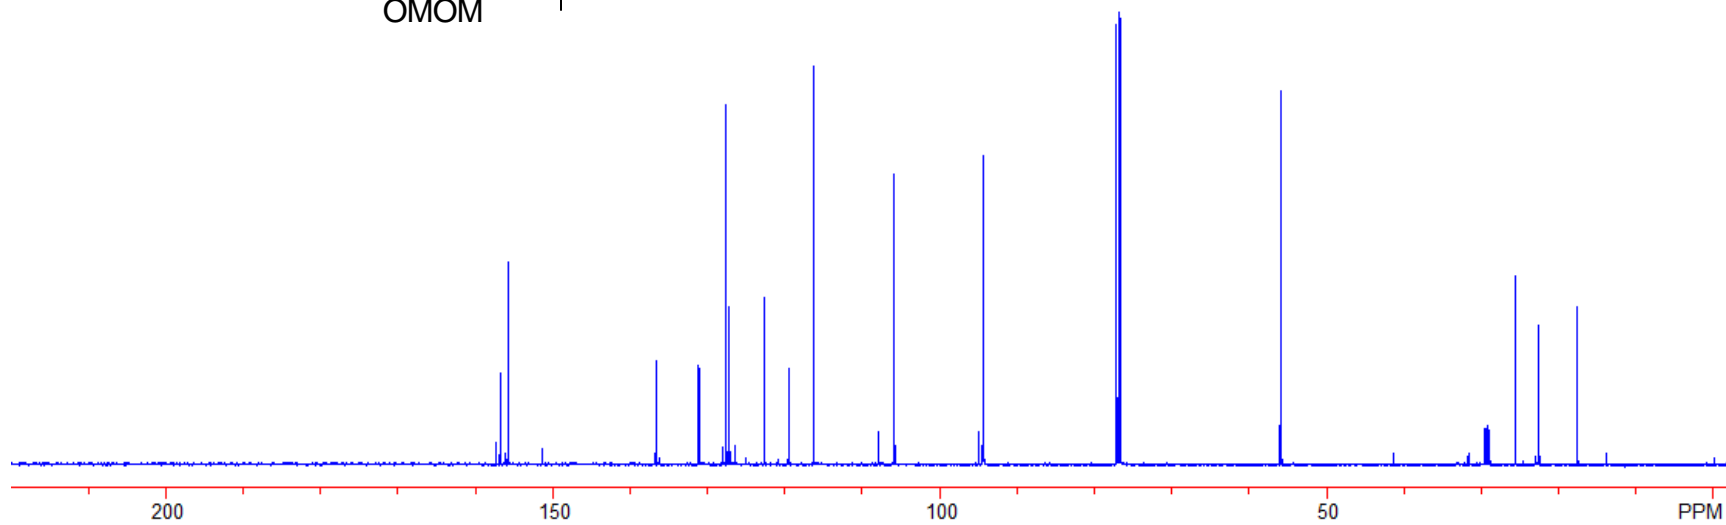

$^{13}\text{C}$  NMR (125 MHz,  $\text{CDCl}_3$ ) spectrum of the new compound **38**.
